# Supplementary material for: Analysis of genes within the schizophrenia-linked 22q11.2 deletion identifies interaction of night owl/LZTR1 and NF1 in GABAergic sleep control
Source: PubMed Central journal article supplement (PMC7205319; doi:10.1371/journal.pgen.1008727), 2020-04-27

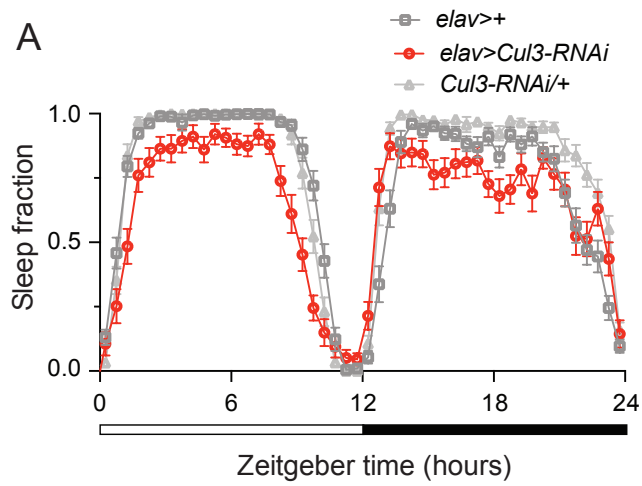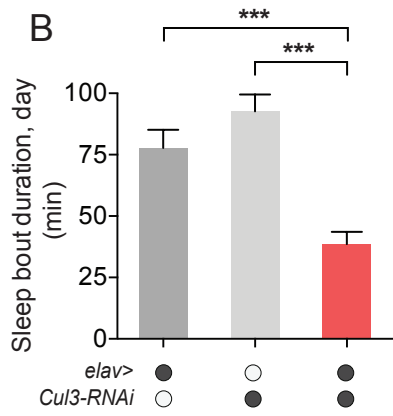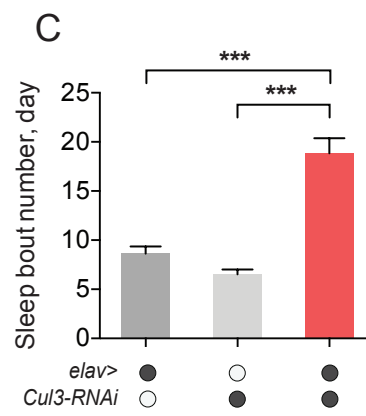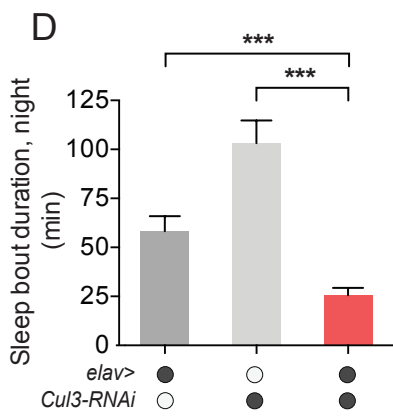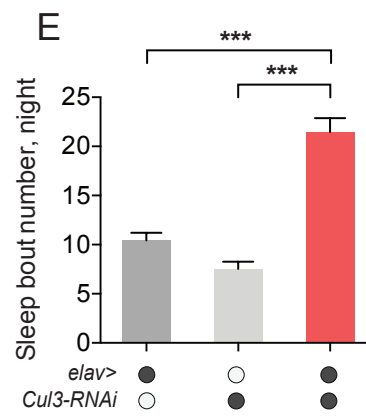

Supplement: pgen.1008727.s006.pdf [file pgen.1008727.s006.pdf]
